# Supplementary material for: Derivation of Xeno-Free and GMP-Grade Human Embryonic Stem Cells – Platforms for Future Clinical Applications
Source: PLoS One. 2012 Jun 20;7(6):e35325. doi: 10.1371/journal.pone.0035325 (PMC3380026; doi:10.1371/journal.pone.0035325)
Supplement: Table S8 — hESC Characterization. (DOC) [file pone.0035325.s012.doc]

TABLE S8

hESC LINE CHARACTERIZATION

[[1]](#endnote-2)

| QC Test | Specification | HAD-C 100 | | | HAD-C 102 | | | HAD-C 106 | | |
| --- | --- | --- | --- | --- | --- | --- | --- | --- | --- | --- |
|  |  | Stock | 1o Bank | 2o Bank | Stock | 1o Bank | 2o Bank | Stock | 1o Bank | 2o Bank |
| Clump # | NLT 5 clumps/vial or straw | **√** | **√** | **√** | **√** | **√** |  | **√** | **√** |  |
| LAL | < 5.0 EU/ml | <0.48 EU/ml | <0.48 EU/ml | <0.48 EU/ml | <0.48 EU/ml | <0.48 EU/ml | <0.48 EU/ml | <0.48 EU/ml | 0.03 EU/ml | <0.03 EU/ml |
| Sterility | Sterile | pass | pass | pass | pass | pass | pass | pass | pass | pass |
| Mycoplasma | Absent | pass | pass | pass | pass | pass | pass | pass | pass | pass |
| Cluster Survival | At least 1 cluster attaches and develops to a colony 4-7 days after thawing | **√** | **√** | **√** | **√** | **√** |  | **√** | **√** |  |
| Morphology | *hESC Colonies* |  | | | | | | | | |
|  | hESC colonies tightly packed cells | **√** | **√** | **√** | **√** | **√** |  | **√** | **√** |  |
|  | Clear, distinguishable borders towards feeders | **√** | **√** | **√** | **√** | **√** |  | **√** | **√** |  |
|  | hESC small relative to fibroblasts | **√** | **√** | **√** | **√** | **√** |  | **√** | **√** |  |
|  | High nucleus to cytoplasm ratio of hESC | **√** | **√** | **√** | **√** | **√** |  | **√** | **√** |  |
|  | Prominent nucleoli visible in some cells | **√** | **√** | **√** | **√** | **√** |  | **√** | **√** |  |
| HLA Typing(Optional) | Definive HLA profile | **√** (P14) | **√** (P25) | (Optional) | **√** (P27) | **√** (P29) |  | (Optional) | **√** (P32) |  |
| DNA Fingerprinting—STR Profile | Unique STR profile | **√** | **√** | **√** | **√** | **√** |  | **√** | **√** |  |
| Karyotype of hESCs | Lot fails if 3 repeat deletions or 2 repeat additions to the chromosomes are noted | Pass  (P12)  30 metaphases | Pass  (P17)  50 metaphases | Pass  (P30)  30 metaphases | Pass  (P21)  30 metaphases | Pass  (P26)  50 metaphases |  | Pass  (P37)  30 metaphases | Pass  (P44)  50 metaphases |  |
| Staining of hESC for Alkaline Phosphatase activity | NLT 60% of the colonies are positive | 100%  (P9) | 100%  (P16) | 100%  (P32) | 100%  (P16) | 100%  (P32) |  | 100%  (P16) | 100%  (P33) |  |
| At least 3 Antigens will be detected by FACS and 3 by Immunostaining of the Following | | | | | | | | | | |
| Immunostaining of | NLT 60% of colonies or cells stain positive |  | | | | | | | | |
| Nanog |  |  |  |  |  |  |  |  |  |  |
| SSEA3 |  |  | (P23) 100% | (P44) 100% |  | (P27) 100% |  |  | (P43) 100% |  |
| SSEA4 |  |  | (P24) 100% | (P32) 100% |  | (P28) 100% |  |  | (P43) 100% |  |
| TRA 1-60 |  | (P17) 100% | (P27) 100% | (P44) 100% | (P15) 100% | (P28) 100% |  | (P24) 100% | (P38) 100% |  |
| TRA 1-81 |  |  | (P24) 100% | (P32) 100% |  | (P28) 100% |  |  | (P43) 100% |  |
| Oct4 |  | (P16) 100% | (P24) 100% | (P33) 100% | (P17) 100% | (P35) 100% |  | (P19) 100% | (P38) 100% |  |
| FACS for | NLT 50% of cells are positive |  | | | | | | | | |
| TRA 1-81 |  |  | (P26)92% | (P45)93% |  | (P30)93% |  |  | (P39)77% |  |
| TRA 1-60 |  |  | (P26)89% | (P42)87% |  | (P30)87% |  |  | (P45)64% |  |
| AP (TRA 2-54) |  |  |  |  |  |  |  |  |  |  |
| CD9 (TG30) |  |  |  |  |  |  |  |  |  |  |
| THY1 (F15-14-1) |  |  |  |  |  |  |  |  |  |  |
| SSEA3 |  |  | (P28)54% | (P45)63% |  | (P30)74% |  |  | (P42)82% |  |
| SSEA1 | NMT 50% of the cells are positive |  | (P30)36% | (P44)13.7 |  | (P35)26% |  |  | (P39)5% |  |
| Pluripotency  RT-PCR  (Optional)39 | Typical hESC profile with markers of pluripotency and differentiation when EBs are tested |  | **√** (P32 hESC)  (P23 EBs) |  |  | **√** (P33 hESC)  (P38 EBs) |  |  | **√** (P35 hESC)  (P40 EBs) |  |
| hESC Doubling Time | ≤ 170 hours |  | 35.6 hours  (P24) | 38.7 hours  (P43) |  | 35 hours  (P35) |  |  | 41.8 hours  (P38) |  |
| KI-67 Staining | NLT 60% cells stain positive when 200 cells are counted |  | 87.5%  (P30) | 90.5%  (P38) |  | 99%  (P37) |  |  | 99%  (P38) |  |
| In vitro differentiation | At least 2 cells stain for | | | | | | | | | |
|  | sox-17 (endoderm) |  | **√** (P31) | **√** (P43) |  | **√**(P41) |  |  | **√**P37) |  |
|  | β-tubulin III **(**ectoderm) |  | **√**P32) | **√**P46) |  | **√** (P31) |  |  | **√**P41) |  |
|  | muscle actin (mesoderm) |  | **√**P29) | **√** (P46) |  | **√** (P32) |  |  | **√** (P41) |  |
| In Vivo:  Teratoma formation | Successful differentiation into teratomas consisting of the three primary germ layers |  | **√** (P30) | **√** (P38) |  | **√** (P37) |  |  | **√** (P30) |  |

Stock

1. * 1o Banks characterized P1-20 after thawing; **2o Banks characterized P21+ after thawing; NLT = Not Less Than; NMT = Not More Than [↑](#endnote-ref-2)
